1 **Evolution of Honey Resistance in Experimental Populations of Bacteria Depends on the Type of**  
2 **Honey, and Has no Major Side Effects for Antibiotic Susceptibility**

3

4 Running title: Honey resistance evolution in *E. coli*

5

6 Authors: Anna M. Bischofberger<sup>1</sup>, Katia R. Pfrunder Cardozo<sup>1</sup>, Michael Baumgartner<sup>1</sup>, Alex R. Hall<sup>1</sup>

7

8 Contact information: <sup>1</sup>Institute of Integrative Biology, ETH Zurich, Switzerland

9

[anna.bischofberger@env.ethz.ch](mailto:anna.bischofberger@env.ethz.ch)

10

[katia.pfrunder@env.ethz.ch](mailto:katia.pfrunder@env.ethz.ch)

11

[michael.baumgartner@env.ethz.ch](mailto:michael.baumgartner@env.ethz.ch)

12

[alex.hall@env.ethz.ch](mailto:alex.hall@env.ethz.ch)

13

14 Abstract:

15 With rising antibiotic resistance, alternative treatments for communicable diseases are increasingly  
16 relevant. One possible alternative for some types of infections is honey, used in wound care since  
17 before 2000 BCE and more recently in licensed, medical-grade products. However, it is unclear  
18 whether medical application of honey results in the evolution of bacterial honey resistance, and  
19 whether this has collateral effects on other bacterial traits such as antibiotic resistance. Here, we used  
20 single-step screening assays and serial transfer at increasing concentrations to isolate honey-resistant  
21 mutants of *Escherichia coli*. We only detected bacteria with consistently increased resistance to the  
22 honey they evolved in with two of the four tested honey products, and the observed increases were  
23 small (maximum two-fold increase in IC<sub>90</sub>). Genomic sequencing and experiments with single-gene  
24 knockouts showed a key mechanism by which bacteria increased their honey resistance was by  
25 mutating genes involved in detoxifying methylglyoxal, which contributes to the antibacterial activity  
26 of *Leptospermum* honeys. Crucially, we found no evidence that honey adaptation conferred cross-  
27 resistance or collateral sensitivity against nine antibiotics from six different classes. These results

28 reveal constraints on bacterial adaptation to different types of honey, improving our ability to predict  
29 downstream consequences of wider honey application in medicine.

30

31 Keywords:

32 honey, *Escherichia coli*, anti-bacterial agents, microbial drug resistance, bacteria, communicable  
33 diseases, leptospermum

34

35 Acknowledgments:

36 A.B. thanks Richard Allen for help with statistical analysis. A.H. acknowledges Swiss National  
37 Science Foundation project 31003A\_165803.

38

39 Article type: Original research article

40

41 **Introduction**

42 Antimicrobial resistance is one of the biggest challenges facing global public health (WHO, 2018). To  
43 preserve the effectiveness of antibiotics and to treat infections caused by resistant bacteria, alternative  
44 approaches are required that can be used instead of antibiotics or after they have failed. One possible  
45 alternative currently being investigated for some applications is honey (Descottes, 2009; Knipping *et*  
46 *al.*, 2012; Vandamme *et al.*, 2013). Produced by the honey bee, *Apis mellifera*, honey has a long  
47 history in human medicine (Breasted, 1948) and has remained a staple treatment in traditional  
48 medicine. More recently, medically certified honeys and honey-containing products have been  
49 licensed in various part of the world, primarily for topical application, such as in wound healing  
50 (Molan and Betts, 2004; Cooke *et al.*, 2015), and treatment of otorhinolaryngological diseases  
51 (Werner and Laccourreye, 2011). The idea is appealing: honey is generally cheap and non-harmful to  
52 patients (Dunford and Hanano, 2004; Knottenbelt, 2014), inhibits bacterial growth (Basualdo *et al.*,  
53 2007; Carter *et al.*, 2016) and can promote wound closure and healing (Molan, 1999). If honey could  
54 be used instead of antibiotics for some applications, this could contribute to managing antibiotic  
55 resistance. However, several open questions remain about whether bacteria exposed to inhibitory  
56 concentrations of honey evolve resistance to it, which genes or pathways are involved, and whether  
57 any such evolutionary responses have downstream effects on other properties relevant for treatment,  
58 in particular antibiotic resistance.

59 Despite open questions about how bacteria evolve honey resistance, the physiological causes of  
60 honey's antibacterial activity have been investigated in various species, including human pathogens  
61 such as *Staphylococcus aureus*, *Pseudomonas aeruginosa*, *Streptococcus mutans* and *Enterococcus*  
62 *faecium* (Kwakman *et al.*, 2008, 2011; Badet and Quero, 2011; Camplin and Maddocks, 2014).  
63 Multiple mechanisms have been implicated, including high sugar/low water content, acidity,  
64 hydrogen peroxide and non-peroxide molecules such as methylglyoxal (White *et al.*, 1963; Allen *et*  
65 *al.*, 1991; Molan, 1992; Mavric *et al.*, 2008), with floral source of the honey being a major  
66 determinant of its mechanism of action (Allen *et al.*, 1991; Lu *et al.*, 2013; Maddocks and Jenkins,  
67 2013). At the phenotypic level, various effects of honey have been reported across different species,  
68 including changes in cell-wall integrity and cell shape (Henriques *et al.*, 2011; Brudzynski and

69 Sjaarda, 2014; Wasfi *et al.*, 2016), quorum sensing (Truchado *et al.*, 2009; Lee *et al.*, 2011; Wang *et*  
70 *al.*, 2012), iron acquisition (Krona *et al.*, 2013; Ankley *et al.*, 2020) and biofilm formation (Merckoll  
71 *et al.*, 2009; Badet and Quero, 2011; Halstead *et al.*, 2016). Perhaps unsurprisingly given this complex  
72 picture of inhibitory mechanisms, research to date on the evolution of honey resistance in bacteria has  
73 reached no clear consensus. For example, Cooper *et al.* (2010) reported no stable increase in  
74 resistance after exposure of various species to medical-grade *Leptospermum* honey *in vitro*, while  
75 Camplin and Maddocks (2014) and Lu *et al.* (2019) detected increased resistance in *P. aeruginosa*  
76 cells recovered from honey-exposed biofilms *in vitro*. Thus, it remains unclear how rapidly bacteria  
77 exposed to honey can evolve reduced susceptibility to it. Another important question is whether  
78 adaptation to honey has side effects for antibiotic susceptibility. This is important for assessing the  
79 risk that honey application could contribute to the spread of antibiotic resistance, affecting the success  
80 of antibiotic treatments used in combination or later against the same bacteria. There is some evidence  
81 that honey resistance affects susceptibility to rifampicin and imipenem in *P. aeruginosa* (Camplin and  
82 Maddocks, 2014). To understand the general picture of how honey resistance affects antibiotic  
83 susceptibility, we need to test a wider range of bacteria and antibiotics, and characterise the genetic  
84 pathways by which bacteria become resistant.

85 We chose to study *E. coli* because it is a common pathogen in humans and animals (Dowd *et al.*,  
86 2008; Suojala *et al.*, 2013), frequently associated with surface wounds and infections of the intestinal  
87 tract that might be suitable for honey treatment (Haffejee and Moosa, 1985; Willix *et al.*, 1992;  
88 Carnwath *et al.*, 2014). Antibacterial resistance has increased in *E. coli* (Tadesse *et al.*, 2012; O'Neill,  
89 2014), and many of the resistance mechanisms found in *E. coli* can also be found in other species  
90 (Philippon *et al.*, 1989; Paulsen *et al.*, 1996), suggesting it as a good model for studying resistance  
91 evolution. To find out how bacteria respond to honey exposure phenotypically and genotypically, we  
92 experimentally evolved *E. coli* in the presence of four different honeys (two medical-grade honeys,  
93 two commercially available honeys) by gradually exposing bacteria to increased honey concentrations  
94 during serial passage. We then measured honey susceptibility of evolved bacteria from this  
95 experiment, as well as population growth in the absence of honey. To identify genes involved in  
96 honey resistance, we used whole-genome sequencing of these evolved isolates, as well as single-gene

97 knockout variants. We also used a second screen for honey-resistant mutants, by exposing many  
98 replicate populations to high honey concentrations in a single-step (selective plating of overnight  
99 cultures). Lastly, we tested for collateral effects of honey adaptation on antibiotic resistance by  
100 determining the phenotypic resistance of honey-adapted isolates to antibiotics of different classes. Our  
101 results show that, even upon gradually increasing exposure, large changes in honey resistance in *E.*  
102 *coli* populations growing *in vitro* are rare. However, for some honey products we identified  
103 mechanisms driving moderate increases in honey resistance, and we find no indication for cross-  
104 resistance between honey and antibiotics.

105

## 106 **Materials and Methods**

### 107 **Organisms and Growth Conditions**

108 We used *E. coli* K-12 MG1655 as parental strain for the evolution experiment and isolation of single-  
109 step mutants. We used *E. coli* K-12 BW25113 and single-gene knockout variants derived from it  
110 (Keio Knockout Collection (Baba *et al.*, 2006)) for knockout experiments. We stored all isolates in  
111 25% glycerol at -80°C. We performed routine culturing in lysogeny broth (LB, Sigma-Aldrich (Merck  
112 KGaA, Germany)) at 37°C with shaking at 180rpm.

113

### 114 **Honeys and Antibiotics**

115 The different honey products we used are listed in Table 1. Honeys were stored in a cool, dark place  
116 and, in the case of medical-grade honeys, opened tubes were only used as long as recommended by  
117 the manufacturer (SurgihoneyRO™: 4 weeks; Medihoney™ Medical Honey: 4 months). Because the  
118 best-before date on commercial honeys does not concern their antimicrobial activity but its edibility,  
119 and because prolonged storage can affect hydrogen peroxide content of honey (Irish *et al.*, 2011),  
120 non-medical-grade honeys were also used for a maximum of four months after opening. After plating  
121 honey samples on agar plates (LB broth with agar (Lennox) (Sigma-Aldrich (Merck KGaA,  
122 Germany)) at 35g/L), we observed colony-forming units with the commercial honey and Manuka  
123 honey. This was no longer the case after filtering honey solutions with a Filtropur S 0.45 filter  
124 (Sarstedt, Germany) (Wasfi *et al.*, 2016). Accordingly, for all four honeys, honey-containing growth

125 media were prepared immediately before the start of each experiment by diluting honey in LB (pre-  
126 heated to 55°C) and filter sterilizing. We purchased amoxicillin (product number A8523),  
127 chloramphenicol (product number 23275), ciprofloxacin (product number 17850), gentamicin  
128 (product number 48760), kanamycin (product number 60615), neomycin trisulfate salt hydrate  
129 (product number N1876), polymyxin B (product number 5291), tobramycin (product number T4014),  
130 and trimethoprim (product number 92131) from Sigma-Aldrich (Merck KGaA, Germany). We  
131 prepared antibiotic stock solutions at the outset of the experiments and filter sterilized (Filtropur S 0.2  
132 (Sarstedt, Germany)) and stored them according to the manufacturers' instructions (stock solutions:  
133 amoxicillin 25mg/mL in sterile distilled water (dH<sub>2</sub>O); chloramphenicol 50mg/mL in 70% ethanol;  
134 ciprofloxacin 20mg/mL in 0.1M HCl; gentamicin 50mg/mL in dH<sub>2</sub>O; kanamycin 40mg/mL in dH<sub>2</sub>O;  
135 neomycin 40mg/mL in dH<sub>2</sub>O; polymyxin B 20mg/mL in dH<sub>2</sub>O; tobramycin 40mg/mL in dH<sub>2</sub>O;  
136 trimethoprim 25mg/mL in DMSO).

137

### 138 **Measuring Susceptibility of Isolates to Different Honeys**

139 We used the 90% inhibitory concentration (IC<sub>90</sub>) of each antibacterial compound as an indicator of  
140 resistance. We defined the IC<sub>90</sub> as the lowest concentration tested above which bacterial growth did  
141 not exceed 10% of growth of the same isolate in the absence of antibacterials (i.e. none of the tested  
142 concentrations at or above the IC<sub>90</sub> supported >10% growth; this definition is used in the results  
143 sections below). A minority of dose-response curves were not monotonic, in that some individual  
144 concentrations below the IC<sub>90</sub> inferred using the above definition supported <10% growth; this did not  
145 affect our overall conclusions (checked by using an alternative definition of the IC<sub>90</sub> as the lowest  
146 individual concentration supporting <10% growth, which supported the same conclusions). We  
147 estimated the IC<sub>90</sub> towards four honey products for ancestral strain *E. coli* K-12 MG1655 (assay A); for 18  
148 single-step putative resistant mutants (assay B, also including the ancestral strain); for 14 serially-passaged  
149 putative honey-resistant mutants and six serially-passaged control isolates (assay C, also including the  
150 ancestral strain); and for 28 single-gene knockout variants and their ancestral strain *E. coli* BW25113  
151 (assay D, for details on selection of single-gene knockout variants see below) by measuring their growth in  
152 liquid culture at different concentrations. For each assay, we transferred independent LB-overnight

153 cultures (cultured in flat-based 96-well microplates (Sarstedt, Germany)) into microplates filled with  
154 various honey concentrations and plain LB as a control, using a pin replicator (1/100 dilution, 2 $\mu$ L in  
155 200 $\mu$ L). We used slightly different concentration ranges in different sets of assays (range of tested  
156 concentrations is given in Table S1). The assays were conducted with independent controls (ancestral  
157 strain) on different days. After inoculating assay microplates, we incubated them overnight at 37°C  
158 and quantified bacterial growth by measuring optical density at 600nm (OD<sub>600</sub>) with a microplate  
159 reader (Infinite® 200 PRO, Tecan Trading AG, Switzerland) at the beginning and end of the  
160 experiment (0h and 24h). We corrected OD<sub>600</sub> scores for the optical density of the media. In each  
161 assay, we assessed multiple replicates of each strain-compound combination (assay A: three replicates;  
162 assay B: five replicates; assay C: four replicates; assay D: three replicates).

163

#### 164 **Experimental Evolution (Fig. S1A)**

165 We serially passaged multiple selection lines of *E. coli* K-12 MG1655 in filtered solutions of each of  
166 the four honey products and in the absence of honey for 22 days, transferring daily (4 honey  
167 treatments + 1 control treatment = 5 evolution environments). In summary: at each transfer, each  
168 selection line was inoculated into multiple wells containing various honey concentrations. After  
169 overnight incubation, we transferred from the well with the highest concentration supporting viable  
170 growth (Fig. S1A). In more detail: to begin the experiment, we streaked out *E. coli* K-12 MG1655  
171 from glycerol stocks onto LB agar plates. After overnight incubation, we inoculated six selection lines  
172 in each evolution environment, each with an independent colony (5 evolution environments x 6  
173 colonies = 30 selection lines). In this first step, we cultured each selection line for 2h in 5mL of LB at  
174 37°C with shaking at 180rpm. Then, for every selection line, we inoculated seven microplate wells  
175 filled with 200 $\mu$ L LB. After overnight incubation, we transferred the seven cultures of each selection  
176 line (5 $\mu$ L of each culture) into a fresh microplate filled with: 200 $\mu$ L of unsupplemented LB (“rescue  
177 well”), LB supplemented with one of five concentrations of the respective honey product, or honey  
178 stock solution (30 or 50 %(w/v)). We incubated microplates overnight at 37°C and quantified  
179 bacterial growth by measuring OD<sub>600</sub> after 0h and 24h. On the following days, for every selection line,

180 we determined the well at the highest honey concentration where  $\Delta OD_{600}$  ( $OD_{600}$  24h –  $OD_{600}$  0h) >  
181 0.1 (an arbitrary cut-off we took as an indication of viable growth) and transferred 5 $\mu$ L to seven wells  
182 in a new microplate. In cases where  $\Delta OD_{600}$  in all honey-supplemented wells was < 0.1, we used the  
183 rescue-well culture to inoculate the fresh microplate. To gradually expose selection lines to higher  
184 concentrations of honey, we adjusted the range of concentrations tested over time, according to the  
185 performance of individual selection lines (concentrations and OD scores over time are given in Fig.  
186 S2). In the control treatment (no honey), we used a single well for each selection line at each transfer.  
187 We did this for 22 days, freezing microplates from days 3, 6, 9, 12, 15, 18, 21 and 22.

188 At the end of the experiment, we isolated a single colony at random from each selection line. On  
189 day 22, we streaked out a sample from the well with the highest honey concentration where  $\Delta OD_{600}$  >  
190 0.1 onto LB agar. After overnight incubation, we picked one colony per selection line, grew it  
191 overnight in 5mL LB and stored it at -80°C. We used colony PCR (primer sequences: forward: 5'-  
192 AGA CGA CCA ATA GCC GCT TT-3'; reverse: 5'-TTG ATG TTC CGC TGA CGT CT-3') to  
193 ensure that all colony isolates were *E. coli* K-12 MG1655. For five selection lines (Medihoney\_01,  
194 Commercial\_02, Commercial\_03, Commercial\_04, Commercial\_05), we found no colonies when  
195 streaking out samples on LB agar at day 22. We initially screened for honey-resistant phenotypes of  
196 colony isolates from the other selection lines by culturing each colony isolate in honey-supplemented  
197 medium at a concentration in which the parental strain was not able to grow. This led us to exclude  
198 five isolates that did not grow at honey concentrations above that of the parental strain  
199 (Surgihoney\_01, Surgihoney\_02, Surgihoney\_03, Surgihoney\_06, Commercial\_01). We then  
200 proceeded with the remaining 14 serially-passaged putative honey-resistant mutants, plus six control  
201 isolates serially passaged in LB, sequencing all 20 genomes and quantifying their honey susceptibility  
202 as described below/above respectively.

203

#### 204 **Genetic Analysis of Serially-Passaged Mutants**

205 We sequenced the 14 serially-passaged, putative resistant mutants and the six LB-adapted control  
206 isolates. Overnight cultures inoculated with single colonies were centrifuged at 5000xg at room  
207 temperature for 10 min. After removal of the supernatant, we stored cell pellets at -20°C until further



208 processing. We used the QIAGEN Genomic-tip 20/G (Cat. No. 10223, Qiagen, the Netherlands)  
209 according to the manufacturer's instructions for genomic DNA (gDNA) extraction. In brief: We  
210 resuspended the bacterial cell pellets in 1mL Buffer B1, 2 $\mu$ L RNase A solution (100mg/mL), 20 $\mu$ L  
211 lysozyme (100mg/mL) and 45 $\mu$ L Proteinase K (20mg/mL). Afterwards, we incubated them at 37°C  
212 for up to 1h. Then, we added 350 $\mu$ L of Buffer B2 and mixed thoroughly by inverting the tubes several  
213 times and vortexing them a few seconds. Following incubation at 50°C for up to 1h, we loaded the  
214 lysates onto the pre-equilibrated QIAGEN Genomic-tips and left the samples to pass the resin by  
215 gravity flow. We washed the QIAGEN Genomic-tips thrice with 1mL Buffer QC to remove any  
216 remaining contaminants. We eluted the DNA twice with 1mL Buffer QF pre-warmed to 50°C,  
217 discarded the Genomic-tips and precipitated the DNA by adding 1.4mL room-temperature  
218 isopropanol to the eluted DNA. We precipitated the DNA by inverting the tube 10-20 times and  
219 spooled the DNA using a glass rod. We immediately transferred the spooled DNA to a  
220 microcentrifuge tube containing 160 $\mu$ L elution buffer (Buffer EB: 10 mM Tris-Cl, pH 8.5) and  
221 dissolved the DNA overnight on a shaker (20rpm). We quantified the obtained gDNA using the  
222 Quant-iT™ dsDNA BR (Broad Range) Assay Kit (Thermo Fisher Scientific, USA) in the Qubit™  
223 Fluorometer (Thermo Fisher Scientific). We used a Nanodrop (Thermo Fisher Scientific) to control  
224 the purity of gDNA (ratios  $A_{260}/A_{280}$  and  $A_{260}/A_{230} \geq 1.8$ ). We sequenced at the Functional Genomic  
225 Center, Zurich, Switzerland, using the Illumina HiSeq 4000 platform after library preparation with the  
226 Nextera XT DNA Library Prep kit (Illumina, USA).

227 We trimmed and quality-filtered all sequences with trimmomatic (Bolger *et al.*, 2014) with the  
228 following parameters: ILLUMINACLIP:<NexteraPE adapters fasta file>2:30:10 ; LEADING: 3;  
229 TRAILING: 3; SLIDINGWINDOW:4:15; MINLEN:80.. We mapped the reads of the ancestral strain  
230 of our resistance isolation experiment ( $2.5 \times 10^6$  reads) against the reference sequence of *E. coli* K-12  
231 MG1655 (NCBI accession number: U00096) using breseq 0.33.1 (Deatherage and Barrick, 2014). We  
232 used gdttools implemented in breseq to integrate the identified mutations into the reference genome.  
233 For variant calling, we mapped all reads of the serially-passaged and single-step putative resistant  
234 mutants (average number of reads per sample:  $4.1 \times 10^6 \pm 1.5 \times 10^6$ ) against the refined reference

235 genome using breseq. The sequencing data has been deposited in the European Nucleotide Archive  
236 under the study accession number PRJEB35347 (<https://www.ebi.ac.uk/ena>).

237

### 238 **Experiments with Single-Gene Knockout Variants**

239 After identifying genes that potentially contribute to honey adaptation (Table S2), we tested for  
240 further evidence of the role of these genes in honey resistance using single-gene knockout variants  
241 from the Keio Knockout Collection (Baba *et al.*, 2006) for *E. coli* K-12. We tested for a change in the  
242 resistance phenotype of these knockout variants relative to the ancestral strain of the knockout  
243 collection, *E. coli* K-12 BW25113, using the resistance phenotyping assay described above (assay D).  
244 When choosing genes to investigate, we concentrated on those (1) which were affected by  
245 independent mutations in at least two selection lines, (2) where mutations were not detected in isolates  
246 from the control treatment, (3) which were not annotated as “pseudogene”, “intergenic” nor “non-  
247 coding”, and (4) for which there is an available knockout variant in the Keio Collection (limited to  
248 non-essential genes).

249

### 250 **Measuring Population Growth of Serially-Passaged Mutants in the Absence of Honey**

251 We tested whether our serially passaged isolates showed altered population growth in the absence of  
252 honey relative to the ancestral strain. To do this, we grew four independent cultures (each inoculated  
253 from a different colony) of each serially-passaged isolate (including control-evolved isolates,  $n = 20$ )  
254 and the ancestral isolate, each in 150 $\mu$ L LB in a microplate in a randomized layout. After overnight  
255 incubation, we used a pin replicator to inoculate a fresh microplate (all wells filled with 150 $\mu$ L LB).  
256 We then measured OD<sub>600</sub> every 15min for 24h (shaking before each measurement).

257

### 258 **Measuring Susceptibility of Serially-Passaged Mutants to Antibiotics**

259 We measured the phenotypic resistance (IC<sub>90</sub>) of the 20 serially-passaged isolates (14 putative  
260 resistant mutants, six LB-adapted control isolates) and of the parental strain (*E. coli* K-12 MG1655)  
261 for nine antibiotics representing six different classes: amoxicillin (penicillin), ciprofloxacin

262 (fluoroquinolone), chloramphenicol (chloramphenicol), gentamicin (aminoglycoside), kanamycin  
263 (aminoglycoside), neomycin (aminoglycoside), polymyxin B (polymyxin), tobramycin  
264 (aminoglycoside), and trimethoprim (dihydrofolate reductase inhibitor). We decided to test several  
265 aminoglycoside drugs (gentamicin, kanamycin, neomycin, tobramycin) because previous studies have  
266 found that bacteria exposed to honey reduce the expression of genes involved in the TCA cycle (Lee  
267 *et al.*, 2011; Jenkins *et al.*, 2014), while others report a link between aminoglycoside susceptibility  
268 and defects or down-regulated gene expression in the bacterial respiratory chain, including the TCA  
269 cycle (Magnet and Blanchard, 2005; Chittezh Thomas *et al.*, 2013; Shan *et al.*, 2015; Su *et al.*,  
270 2018; Zhou *et al.*, 2019). We conducted the assays using a similar protocol as described above for  
271 honey. In brief, we first incubated independent replicate populations of each isolate in a randomized  
272 layout in microplates overnight. From these microplates we inoculated assay plates filled with LB  
273 supplemented with antibiotics at various concentrations. With 2-fold broth dilution, the non-zero  
274 concentration ranges were: amoxicillin 128 – 4 µg/mL, chloramphenicol 32 – 1 µg/mL, ciprofloxacin 1 –  
275 0.03125 µg/mL, gentamicin 32 – 1 µg/mL, kanamycin 32 – 1 µg/mL, neomycin 64 – 2 µg/mL,  
276 polymyxin B 4 – 0.125 µg/mL, tobramycin 32 – 1 µg/mL, trimethoprim 4 – 0.125 µg/mL. We measured  
277 bacterial growth by the change in OD<sub>600</sub> (0h, 24h) as described above. We conducted the assays for all  
278 antibiotics on the same day.

279

### 280 **Single-Step Isolation of Honey-Resistant Mutants (Fig. S1B)**

281 As a second screen for mutants of *E. coli* K12 MG1655 with increased honey-resistance, we plated  
282 aliquots of multiple independent overnight cultures, grown in the absence of antibiotics, on LB agar  
283 supplemented with each honey product.

284 For each honey type, we first grew 54 independent overnight cultures (250µL per culture in LB in  
285 a 96-well microplate; Fig. S1B). We then plated each culture onto a separate honey-supplemented LB  
286 agar plate (prepared in 6-well culture plates (Sarstedt, Germany)), plating 100µL of 18 separate  
287 cultures at each of three concentrations per honey product. We prepared honey-supplemented LB agar  
288 by adding LB-honey solution (at double the concentration of the desired final concentration in the

289 plates, prepared as described above) to hand-warm double concentrated LB agar (i.e., at 70g/L agar).  
290 After mixing, we added 4mL of this honey-supplemented agar to wells. We used honey  
291 concentrations 1.25-, 1.5-, 2- or 3-times higher than previously determined IC<sub>90</sub>s of the wild-type  
292 strain in liquid. We incubated the plates overnight at 37°C before checking for resistant mutants. For  
293 SurgihoneyRO™, Medihoney™ and Manuka honey, we picked six putative honey-resistant colonies,  
294 each from a separate well. When isolating colonies, we prioritized those from wells with higher  
295 concentrations of honey. For commercial honey, we observed no viable colonies on honey-  
296 supplemented agar despite four attempts on different days (total of 216 cultures). We cultured the  
297 selected putative resistant colonies overnight in 5mL LB and suspended them in 25% glycerol for  
298 storage at -80°C. We then tested these 18 single-step putative honey-resistant mutants for phenotypic  
299 resistance as described above. We also used a second test to see if putative honey resistance  
300 phenotypes were robust, by streaking out frozen stocks of each colony isolate on honey-supplemented  
301 agar at a concentration inhibitory to the parental strain. Only three of 18 single-step putative honey-  
302 resistant mutants were able to form colonies under these conditions (Medihoney\_10, Surgihoney\_09,  
303 Surgihoney\_10).

304

### 305 **Statistical Analysis**

306 Phenotypic honey resistance of serially-passaged mutants: To test whether isolates from different  
307 evolution environments had different honey-resistance profiles, we used a linear-mixed effects model  
308 (lmer function in R's lmerTest package (R version: 4.0; package version: 3.1-2)), with evolution  
309 environment and assay compound as fixed effects and genotype (isolate) as a random effect. We  
310 compared models with and without the interaction between fixed effects, using the anova function of  
311 the stats package to test significance. When looking at individual assay compounds, we used  
312 evolution environment as a fixed effect and genotype as a random effect. We used maximum  
313 likelihood estimation ( $REML = F$ ). Wild-type data was excluded from this analysis; we tested for  
314 differences in IC<sub>90</sub> between evolved isolates and the wild type separately, with *t*-tests (*p*-values  
315 adjusted for multiple testing using the Holm-Bonferroni method).

316 Population growth of serially-passaged mutants in absence of honey: We used R's `nls` and `SSlogis`  
317 functions in the `stats` package to estimate the growth rate and yield for each culture, with yield  
318 corresponding to the *Asym* parameter of the models (= asymptote) and growth rate corresponding to  
319 the inverse of the *scal* parameter (= numeric scale parameter on input axis). We tested for a difference  
320 in growth parameters between each evolved isolate and the parental strain with a *t*-test, adjusting *p*-  
321 values using sequential Bonferroni correction. We also tested for an average difference in growth rate  
322 or yield among evolved isolates from different evolution environments. We did this using a linear  
323 mixed-effects model, with evolution environment as a fixed effect and genotype as random effect, and  
324 excluding data from the wild type. We used maximum likelihood estimation (*REML = F*) with the  
325 `lmer` function in the `lmerTest` package.

326 Phenotypic resistance profiles of serially-passaged mutants (antibiotics): We conducted an  
327 Analysis of Variance (ANOVA), using the `aov` function in R's `stats` package, to test whether there is  
328 cross-resistance between honey and antibiotics, with data on the phenotypic antibiotic resistance of  
329 isolates serially passaged in different honeys. We tested each evolved-isolate-versus-wild-type  
330 combination separately, with genotype (evolved vs wild type) and assay compound (antibiotic) as  
331 factors, including the interaction term and with *p*-values adjusted using the Holm-Bonferroni method.

332

333

## 334 **Results**

335

### 336 **Experimental Evolution of Manuka Honey-Resistant Bacteria by Serial Passaging**

337 During serial passage at gradually increasing honey concentrations (Fig. S1A), most selection lines  
338 showed improved population growth at concentrations that were initially inhibitory to the ancestral  
339 strain (Fig. S2 & S3). When we measured the phenotypic resistance of 14 putative honey-resistant  
340 mutants and six control isolates, each isolated from a different selection line after 22 days, several  
341 showed increased resistance compared to the ancestral strain against one or more honey products (Fig.  
342 1 & S4). The average change in resistance varied among evolved isolates passaged with different  
343 honey compounds (effect of evolution environment:  $F_{4, 20} = 1.799$ ,  $p > 0.1$ ). These differences also  
344 depended on which honey compound was used in the assay (evolution environment  $\times$  assay

345 environment interaction:  $\chi^2(12) = 234.99$ ,  $p < 0.001$ ). We observed the largest change in resistance for  
346 mutants selected with Manuka honey or Medihoney™ when they were assayed with Manuka honey  
347 (mean change relative to the ancestor of 2.13-fold (s.d. =  $\pm 0.22$ ) and 2.07-fold (s.d. =  $\pm 0.2$ ),  
348 respectively). Manuka honey resistance of Manuka honey- and Medihoney™-evolved isolates was  
349 also significantly higher than for control-evolved isolates from the honey-free LB-medium treatment  
350 ( $t_{9,9} = 6.71$ ,  $p < 0.001$  and  $t_9 = 6.15$ ,  $p < 0.001$ , respectively). On average, Manuka honey-evolved and  
351 Medihoney™-evolved isolates also had moderately increased resistance to Medihoney™ (mean  
352 change relative to the ancestor of 1.15-fold (s.d. =  $\pm 0.16$ ) and 1.17-fold (s.d. =  $\pm 0.1$ ), respectively),  
353 but this was not significantly different from that of control-evolved isolates on average (Manuka:  $t_{8,1} =$   
354  $-0.24$ ,  $p > 0.05$ ; Medihoney™:  $t_{8,2} = 0$ ,  $p > 0.05$ ). Some other individual isolates had consistently  
355 increased Manuka honey or SurgihoneyRO™ resistance (all replicates for a given isolate higher than  
356 all replicates for the ancestor; Fig. 1 & S4), but these changes were small compared to those for  
357 Manuka honey- and Medihoney™-evolved isolates tested with Manuka honey. Thus, after  
358 experimental evolution we observed the strongest evidence of honey adaptation with Manuka honey.  
359

### 360 **Honey Adaptation Is Linked to Mutations in *nemAR* and *clpP***

361 Genomic sequencing of our serially passaged isolates revealed changes at several loci (Fig. 2, Table  
362 S2). Some loci were mutated multiple times independently in honey-evolved colony isolates, but not  
363 in control-evolved isolates (Table S2, Fig. 2), indicating a possible role in adaptation to honey. Two  
364 such genes were *clpP* (serine protease, mutated in two Manuka honey-evolved isolates) and *nemR*  
365 (DNA-binding transcriptional repressor, mutated in four Manuka honey-evolved isolates and three  
366 Medihoney™-evolved isolates; Table S2, Fig. 2). The intergenic region between *ydhL* and *nemR* was  
367 mutated in the remaining two Manuka honey-adapted isolates and the remaining two Medihoney™-  
368 adapted isolates (Table S2, Fig. 2). An additional gene for which we found mutations in multiple  
369 isolates serially passaged in Manuka honey is *yafS* (methyltransferase; Table S2, Fig. 2), located next  
370 to *gloB*, the gene encoding glyoxalase II, an enzyme involved in detoxification of reactive aldehydes  
371 (Ozyamak *et al.*, 2010). In control-evolved isolates, we found parallel mutations in *fimE*, a  
372 recombinase responsible for on-to-off switching of type 1 fimbriae expression, and *flhD*, one of two

373 transcriptional activators of the *E. coli* flagellar regulon but also involved in cell division (Klemm,  
374 1986; Iino *et al.*, 1988; Liu and Matsumura, 1994; Prüß and Matsumura, 1996), consistent with past  
375 work with LB-adapted isolates (Knöppel *et al.*, 2018). In summary, we found parallelisms in both  
376 control-evolved and honey-evolved isolates, and in particular every Manuka honey- and  
377 Medihoney™-evolved isolate had a mutation in or affecting *nemR*. As we discuss below, this may  
378 reflect the role of *nemR* in methylglyoxal degradation (Ozyamak *et al.*, 2013), an active component of  
379 *Leptospermum* honeys.

380

### 381 **Single-Gene Knockouts Support a Role for *nemR* in Honey Resistance**

382 We used single-gene knockout variants of several genes that were mutated in serially-passaged  
383 isolates to test for further evidence that they play a role in honey resistance (Fig. 3 & S5). The  
384 knockout variant  $\Delta nemR$  had increased Manuka honey resistance (all replicates higher than all  
385 replicates of the wild-type strain). This variant also showed increased average resistance to  
386 Medihoney™, although this was not consistent across all replicate assays (Fig. 3 & S5). This is  
387 consistent with the above finding that all isolates serially passaged in Manuka honey or Medihoney™  
388 had mutations in or close to *nemR*, and all were more resistant to Manuka honey and Medihoney™  
389 than the ancestral strain. In  $\Delta clpP$ , the knockout of the other gene for which we observed independent  
390 mutations in multiple honey-evolved isolates, we observed a similar pattern: increased resistance to  
391 Manuka honey (in all replicate assays) and higher median Medihoney™ resistance (two out of three  
392 replicates higher than wild-type). This is consistent with the increased resistance for these honeys we  
393 observed with the two Manuka honey-selected isolates with mutations in *clpP* (Fig. 2 & S4). Two  
394 other knockout variants,  $\Delta nemA$  and  $\Delta eda$ , had consistently altered resistance to Manuka honey, with  
395  $\Delta eda$  having a higher susceptibility than the ancestral strain. In summary, independent deletion of two  
396 genes, *nemR* and *clpP*, which were also directly or indirectly affected by mutations in several of our  
397 serially-passaged isolates, conferred increased resistance to Manuka honey and Medihoney™.

398

### 399 **Impaired Growth in the Absence of Honey for Honey-Evolved Compared With Control- 400 Evolved Isolates**

401 Most serially passaged isolates (both honey-evolved and control-evolved) had increased population  
402 growth rates relative to the ancestral strain in the absence of honey (Fig. 6). However, when we  
403 compared control-evolved isolates with honey-evolved isolates, control-evolved isolates had higher  
404 growth rates on average compared to all four types of honey-evolved isolates (linear mixed-effects  
405 model: Manuka honey:  $t_{20} = -4.355$ ,  $p < 0.001$ ; Medihoney™:  $t_{20} = -5.538$ ,  $p < 0.001$ ;  
406 SurgihoneyRO™:  $t_{20} = -4.078$ ,  $p < 0.001$ ; commercial honey:  $t_{20} = -4.671$ ,  $p < 0.001$ ). By contrast, we  
407 found little effect of serial passaging on growth yield in evolved isolates compared to the ancestral  
408 strain (Fig. S6). Comparing the growth yield in different evolution environments, we found no  
409 significant difference between isolates serially passaged in LB and honey-evolved isolates (linear  
410 mixed-effects model: all  $p > 0.05$ ; Fig. S6). In summary, for most experimentally evolved isolates we  
411 found a positive effect of serial passage on growth rate, but honey-adapted isolates had a lower  
412 growth rate on average compared to isolates serially passaged in the absence of honey.

413

#### 414 **No Evidence for Cross-Resistance Between Honey and Antibiotics**

415 We determined the phenotypic resistance of our serially-passaged isolates and the ancestral strain to  
416 nine antibiotics of six different classes (Fig. 5; Fig. S7). We found only a single case out of 180  
417 combinations (20 serially-passaged isolates  $\times$  9 antibiotics) where antibiotic resistance was  
418 consistently altered compared to the ancestral strain (higher/lower  $IC_{90}$  for all mutant replicates  
419 compared to all replicates of ancestor). This was for one Manuka honey-evolved isolate, Manuka\_05,  
420 tested with polymyxin B. For seven of the other eight antibiotics, the largest difference shown by  
421 individual replicates relative to the median of the ancestral replicates was two-fold or less. For the  
422 remaining antibiotic, kanamycin, some individual replicates had differences of four-fold compared to  
423 the ancestor. The overall lack of major differences between evolved isolates and the ancestral strain  
424 was supported by Analysis of Variance (testing each evolved-isolate-versus-wild-type combination  
425 separately, with genotype (evolved vs wild type) and assay compound (antibiotic) as factors,  
426 including the interaction term and with  $p$ -values adjusted using the Holm-Bonferroni method); this  
427 indicated a single significant effect of genotype, for isolate Manuka\_06. Thus, we found no evidence  
428 for appreciable changes in sensitivity to antibiotics in serially-passaged honey-adapted isolates.



429

430 **Single-Step Screening Supports Similar Variation of Resistance Evolution Among Honey**  
431 **Products**

432 We tested whether our finding that resistance evolution was more pervasive with Manuka honey than  
433 the other honey compounds also holds true when bacteria are exposed to inhibitory honey  
434 concentrations suddenly, rather than gradually. We did this by plating aliquots from multiple  
435 independent, replicate overnight cultures directly onto honey-supplemented agar, and picking the  
436 resulting colony isolates that showed a putative resistance phenotype. As for our serially passaged  
437 isolates above, we observed the largest increases in resistance for colony isolates from the Manuka-  
438 honey treatment, when assayed with Manuka honey (Fig. S8). For SurgihoneyRO™ and  
439 Medihoney™, we observed colonies on some of our plates, but after picking six colonies for each  
440 compound and testing their phenotypic resistance, none of them had consistently altered resistance to  
441 the honey they were selected with. When we streaked out frozen stocks of these 12 putative honey-  
442 resistant colony isolate on honey-supplemented agar at a concentration inhibitory to the parental  
443 strain, only 3 out of 12 isolates formed colonies (Medihoney\_10, Surgihoney\_09, Surgihoney\_10).  
444 Thus, most putative SurgihoneyRO™- and Medihoney™-resistant mutants showed unstable  
445 phenotypic resistance across multiple rounds of isolation, culturing and restreaking (we discuss this  
446 further in the context of earlier, similar observations below). For commercial honey, we obtained no  
447 viable colonies despite repeating the assay an additional three times on different days (216 aliquots in  
448 total for commercial honey). In summary, we isolated single-step resistant mutants with Manuka  
449 honey, but found no colony isolates with robust resistance phenotypes to SurgihoneyRO™,  
450 Medihoney™ or commercial honey, consistent with our finding in serial passage that resistance  
451 evolved most readily against Manuka honey.

452

453 **DISCUSSION**

454 We found *E. coli* does not easily develop large increases in honey resistance upon serial passage at  
455 gradually increasing concentrations, or upon plating of many replicate populations at inhibitory  
456 concentrations. However, we identified a set of genes important in adaptation to honey, which

457 conferred moderate increases in resistance to Manuka honey. The known physiological role of this  
458 genetic pathway helps to explain why these genetic changes, and associated increases in phenotypic  
459 resistance, were specific to *Leptospermum* honeys (detoxification of methylglyoxal, which has been  
460 found to be the major contributor to the antibacterial activity of these honeys (Adams *et al.*, 2008;  
461 Mavric *et al.*, 2008)). This indicates the likelihood of honey resistance upon medical application may  
462 depend critically on the type or combination of honey products used. Furthermore, we found that  
463 honey adaptation *in vitro* had only minimal side-effects for antibiotic resistance.

464 The first important implication of our results is that *E. coli* does not readily become resistant to  
465 honey, which is promising in the context of expanding medical use of honey. Previous studies also  
466 had difficulty in isolating mutants with stable honey resistance, and/or found that honey resistance  
467 phenotypes revert quickly in the absence of honey (Cooper *et al.*, 2010). This is consistent with our  
468 observation that several putative resistant mutants from our single-step screen had unstable  
469 phenotypes, and some serially passaged populations that attained the ability to grow at increased  
470 honey concentrations subsequently lost this ability upon transfer to fresh medium (referred to by  
471 (Abdel-Azim *et al.*, 2019) as *second transfer crash* (STC)). One possible explanation is that non-  
472 genetic changes such as persister formation or other morphological changes enable temporary  
473 population survival or growth in otherwise inhibitory concentrations. Consistent with honey inducing  
474 physiological responses that are not necessarily heritable, Brudzynski and Sjaarda (2014) observed  
475 morphological changes in *E. coli* cultures exposed to honey, including changes in cell shape /  
476 filamentation.

477 The second key implication of our results is that, to our knowledge, this is the first report of a  
478 specific genetic mechanism linked to decreased honey susceptibility, namely changes affecting the  
479 *nemAR* operon, and alternatively via changes affecting *clpP*. In support, *nemR* and its operon have  
480 previously been described as being involved in physiological processes that we can expect to be  
481 beneficial during honey exposure. Manuka honey and Medihoney™ are both *Leptospermum* honeys,  
482 whose high non-peroxide antimicrobial activity is attributed to their relatively high content of  
483 methylglyoxal (Allen *et al.*, 1991; Mavric *et al.*, 2008), a small amount of which bacteria produce  
484 intracellularly (Töttemeyer *et al.*, 1998). Ozyamak *et al.* (2013) linked the *nemAR* operon to

485 methylglyoxal detoxification. The *nemAR* operon is located upstream from the glyoxalase system  
486 (Ozyamak *et al.*, 2013) which consists of GlxI and GlxII (glyoxalase I and II, encoded by *gloA* and  
487 *gloB* respectively), the two most important enzymes in the detoxification pathway of methylglyoxal  
488 (Clugston *et al.*, 1998; MacLean *et al.*, 1998; Mannervik, 2008). Deletion of *nemR*, the repressor  
489 gene, results in increased transcription both of *nemA* and *gloA* (Ozyamak *et al.*, 2013). Thus, the  
490 finding that all isolates serially passaged in supposedly methylglyoxal-rich *Leptospermum* honeys  
491 have mutations in or close to the repressor gene *nemR* allows for the speculation that, in this context,  
492 deletion of this gene is beneficial because it leads to increased methylglyoxal detoxification. Similarly,  
493 *clpP*, another gene we found independently mutated in multiple Manuka honey-adapted isolates, was  
494 shown by Jenkins *et al.* (2014) to be overexpressed in *Leptospermum* honey-exposed methicillin-  
495 resistant *S. aureus*, supporting a role for this gene in honey resistance in multiple species.

496 The importance of methylglyoxal detoxification in increased honey resistance is further supported  
497 by the variation we observed among honey compounds. Robust resistant mutants emerged in our  
498 single-step screen only with a *Leptospermum* honey (Manuka) with a high concentration of  
499 methylglyoxal, but not with the other three compounds. During serial passage we saw a similar trend:  
500 the most consistent increases in resistance were with the two *Leptospermum* honey products. By  
501 contrast, resistance of putative single-step resistant mutants isolated from SurgihoneyRO™-  
502 supplemented agar was not stable, and we could not isolate any spontaneous mutants for the  
503 commercial honey we used (despite observing increased population growth at inhibitory  
504 concentrations during serial passage). This commercial honey is a blend of honeys with unknown  
505 flower sources from different South-American countries. Drawing a parallel to antibiotics, where  
506 combinations of antibiotics can make it harder for bacteria to evolve resistance (Baym *et al.*, 2016),  
507 we speculate that resistance evolution against this honey was rare in our experiments because it is a  
508 form of combination treatment. This raises the possibility that effective application of honey in  
509 treatment may benefit from combining multiple types of honey products with different mechanisms of  
510 action. We note that despite variation among honey products, all isolates in our experiment were  
511 inhibited by honey concentrations comparable to those found in medical-grade honey products (63–  
512 100% in products recommended/licensed for medical wound care,

513 <http://www.medihoney.de/index.html>). We hypothesize that the multi-faceted nature of honey's  
514 antibacterial activity (Wang *et al.*, 2012; Nolan *et al.*, 2019) contributes to the difficulty of bacteria  
515 evolving resistance to such high concentrations.

516 The third major implication of our results is that honey adaptation did not come with collateral  
517 effects on antibiotic resistance. The lack of collateral effects on antibiotic resistance is an important  
518 and promising aspect in the context of wider medical application of honey, and contrasts starkly with  
519 the frequent occurrence of cross-resistances between antibiotics (Szybalski and Bryson, 1952;  
520 Gutmann *et al.*, 1985) and between antibiotics and some other antimicrobial agents (Loughlin *et al.*,  
521 2002; Braoudaki and Hilton, 2004; Baker-Austin *et al.*, 2006; Allen *et al.*, 2017; Bischofberger *et al.*,  
522 2020). We do not exclude that more significant changes in antibiotic resistance might be observed in  
523 mutants or strains with larger changes in honey resistance than the moderate increases we observed  
524 here, if such strains exist. A key avenue for future work is therefore to determine whether any genetic  
525 variation in natural populations associated with variable honey resistance is independent of variation  
526 in antibiotic resistance, as in our experiment. Another important aspect to consider is honey's  
527 potential effect on other bacterial virulence factors. Biofilm formation is an effective bacterial defense  
528 mechanism against a wide range of antimicrobials (Costerton *et al.*, 1995). Several of the genes we  
529 found mutated in honey-adapted isolates have a known role in biofilm formation (*fimA*, *fimE*, *nlpD*,  
530 *ompR*, *yeaJ* (Prigent-Combaret *et al.*, 2001; Niba *et al.*, 2007; Wu and Outten, 2009; Amores *et al.*,  
531 2017)). Honey or honey-resistance mechanisms might therefore also have downstream effects for  
532 biofilm formation or the expression of other virulence factors. On the other hand, because honey has  
533 shown effective inhibition of a wide range of pathogens (Carter *et al.*, 2016; Hillitt *et al.*, 2017; Yabes  
534 *et al.*, 2017), and the principal genes involved in honey resistance in our experiment are conserved in  
535 multiple pathogenic species (e.g., *nemR* or analogues are present in *Klebsiella pneumoniae*,  
536 *Acinetobacter baumannii* and *Salmonella typhimurium*), our work identifies candidate loci that may  
537 be involved in resistance in other species. This is another relevant area for future research in the  
538 context of medical honey application.

539 Our results also provided indirect evidence of growth costs associated with honey adaptation.  
540 Growth in the absence of selecting antibacterials is widely considered an important parameter in the

541 long-term spread of resistance (Andersson and Hughes, 2010). The larger increase in growth rate  
542 observed in our control-evolved isolates compared to honey-adapted isolates suggests either (i) that  
543 honey adaptation constrained adaptation to other aspects of the environment, preventing acquisition of  
544 other beneficial mutations, or (ii) that honey-resistance mutations combined with other types of  
545 beneficial mutations conferred a smaller net increase in growth rate in honey-free growth medium  
546 compared to other beneficial mutations alone. Our sequence data are more consistent with the former:  
547 control-evolved populations had parallel mutations in flagella and fimbriae genes (*flhD* and *fimE*),  
548 consistent with past work with LB-adapted *E. coli* (Knöppel *et al.*, 2018). These mutations were much  
549 less common in honey-adapted colony isolates (Fig. 2). This could be due, for example, to epistatic  
550 interactions between the different types of adaptive mutations (Scanlan *et al.*, 2015). The parallelism  
551 we observed for these genes might also be responsible for the increased honey resistance of control  
552 isolates (Fig. S4). However, a full understanding of the growth costs and benefits associated with  
553 individual honey-resistance alleles and their interactions with other types of beneficial mutations is  
554 beyond the scope of this paper, and was not our aim here, but would make an interesting avenue for  
555 future work.

556 In conclusion, honey resistance in our experiment only evolved with a subset of the compounds we  
557 tested, and only to a moderate degree. This is promising in the context of medical application of  
558 honey. A further positive aspect is that we found no evidence of strong downstream effects on  
559 antibiotic susceptibility in isolates adapted to honey *in vitro* via chromosomal mutation. Finally, we  
560 identified putative genetic mechanisms involved in honey adaptation, via changes affecting genes  
561 involved in detoxifying methylglyoxal, making this mechanism most relevant for *Leptospermum*  
562 honeys such as Manuka honey.

563 **Tables**

564

565 **Table 1. Honey products used in this study.**

| Product name                                                        | Product description                                                                                  | Initial IC <sub>90</sub> for <i>E. coli</i> K-12 MG1655 | Manufacturer                                           | Purchased from                                                                                                                                                         |
|---------------------------------------------------------------------|------------------------------------------------------------------------------------------------------|---------------------------------------------------------|--------------------------------------------------------|------------------------------------------------------------------------------------------------------------------------------------------------------------------------|
| <i>SurgihoneyRO</i> <sup>TM</sup>                                   | medical honey; sterile, bio-engineered; undiluted; single-origin (unspecified)                       | 5%(w/v)                                                 | Maotoke Holdings Ltd, Abingdon, United Kingdom         | tubes of 20g and 50g: H&R Healthcare, Hull, United Kingdom                                                                                                             |
| <i>Medihoney</i> <sup>TM</sup> Antibacterial Medical Honey          | medical honey; sterile, undiluted; <i>Leptospermum</i> honey (methylglyoxal content unspecified)     | 16%(w/v)                                                | sorbion austria, Zwölfaxing, Austria                   | tubes of 20g: Puras AG, Bern, Switzerland; tubes of 50g: The Honeydoctor, The Littledart Company Ltd, Tiverton, United Kingdom, and puravita ag, Speicher, Switzerland |
| <i>MGO</i> <sup>TM</sup> Manuka Honey <i>MGO</i> <sup>TM</sup> 550+ | consumer product; natural, undiluted; <i>Leptospermum</i> honey (methylglyoxal content of 550 mg/kg) | 10%(w/v)                                                | Manuka Health New Zealand Ltd, Te Awamutu, New Zealand | 250g jars: nu3 GmbH, Berlin, Germany                                                                                                                                   |
| Commercial honey (Fairtrade Liquid Blossom Honey)                   | consumer product; natural, undiluted; poly-origin (Chili, Guatemala, (Mexico))                       | 10%(w/v)                                                | Coop, Basel, Switzerland                               | 550g jars: Coop, Basel, Switzerland                                                                                                                                    |

566

567

568 **Figures**

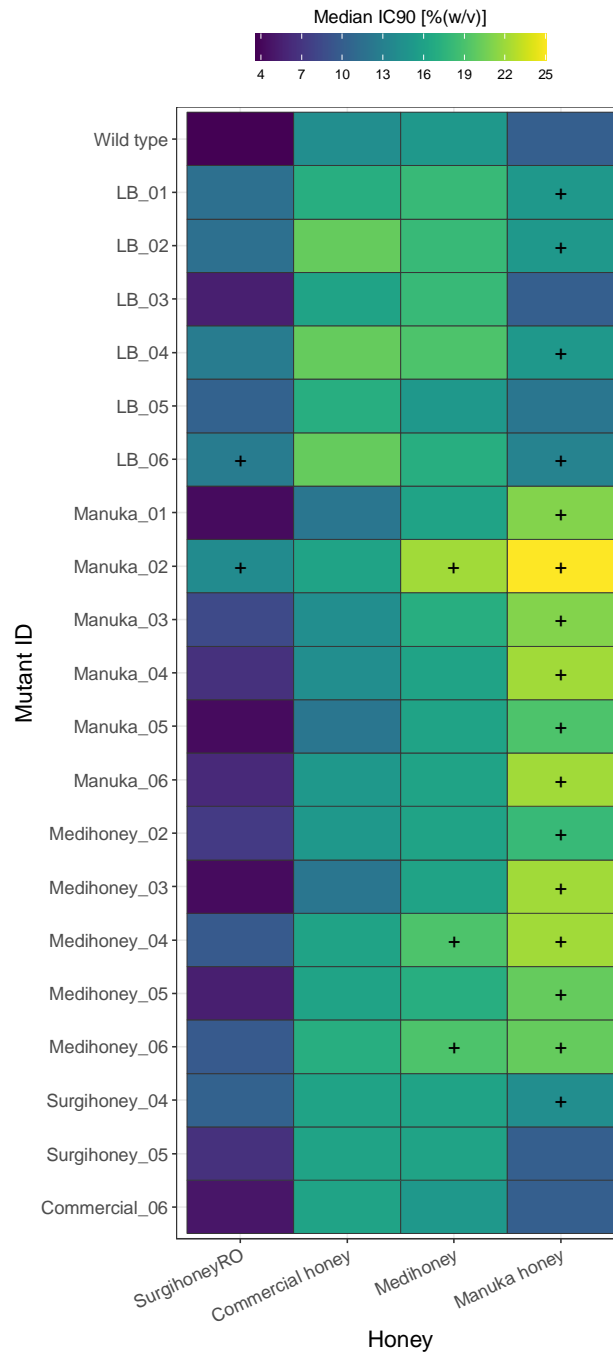

569 **Figure 1.**

570 **Figure 1. Susceptibility of serially-passaged, putative resistant mutants with four different**  
571 **honey compounds.** Each cell gives the median  $IC_{90}$  for a given isolate (the ancestral strain K-12  
572 MG1655, in the top row, or a putative resistant mutant serially passaged with one of the four honey  
573 compounds, labelled according to compound and replicate selection line) assayed with one of the four  
574 honey compounds (columns). Each value is the median of four independent replicates; combinations  
575 where all replicates of a putative resistant mutant were higher than all replicates of the ancestor in the  
576 same treatment are indicated with a “+”. Individual replicates for each strain are shown in Fig. S4.



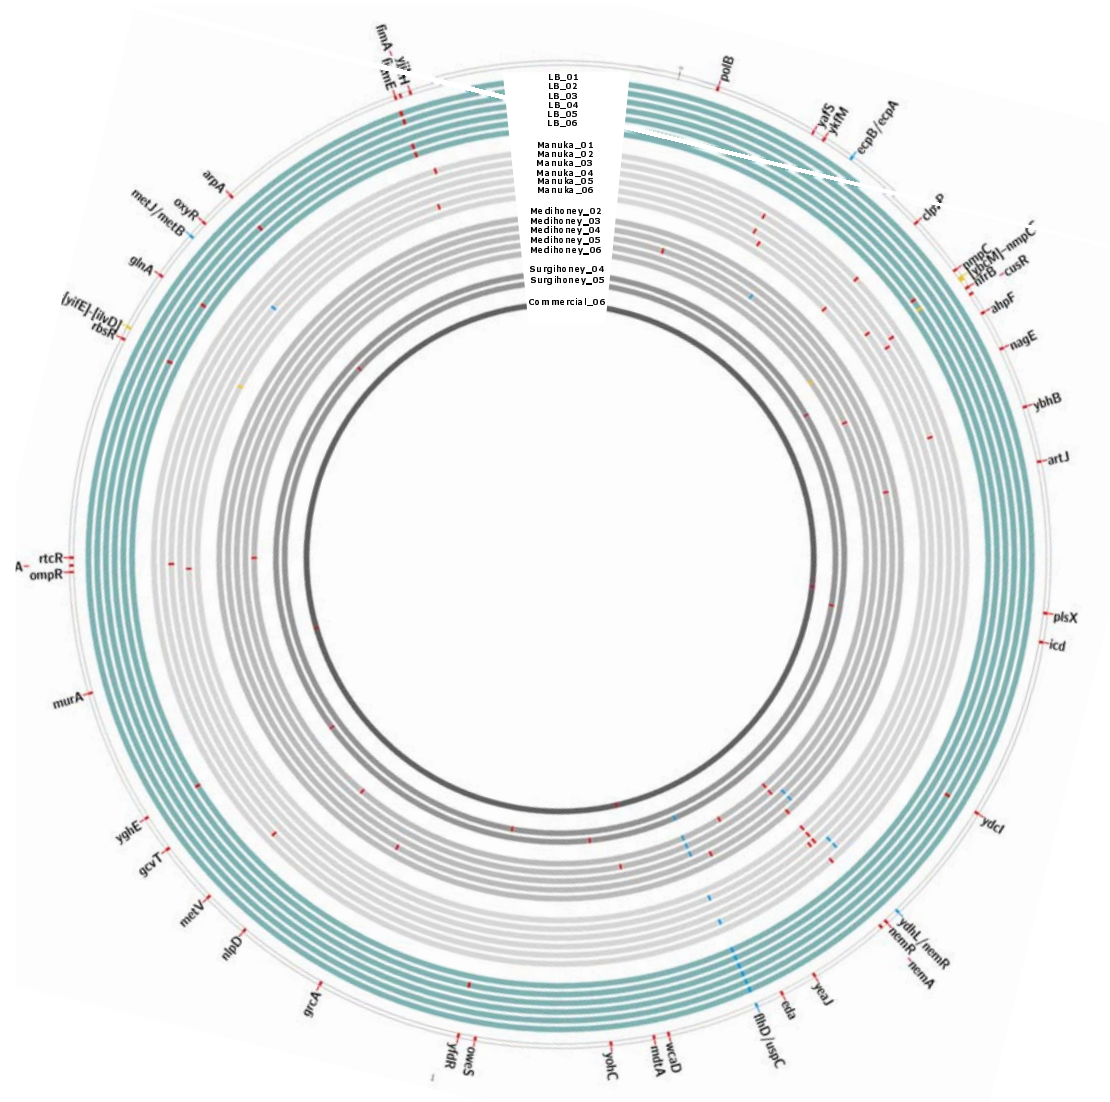

577 **Figure 2.**

578 **Figure 2. Genetic changes in 20 serially-passaged isolates of *E. coli* K-12 MG1655.** The outermost  
579 ring represents the ancestral isolate with coloured tiles for all genes in which we found mutations in  
580 serially-passaged isolates. Each inner circle represents one serially-passaged isolate: in turquoise:  
581 control treatment; in grey: four different honey treatments. Genetic mutations are indicated with  
582 coloured tiles: red: mutations in one gene; yellow: intergenetic mutations; blue: deletions >1000bp.

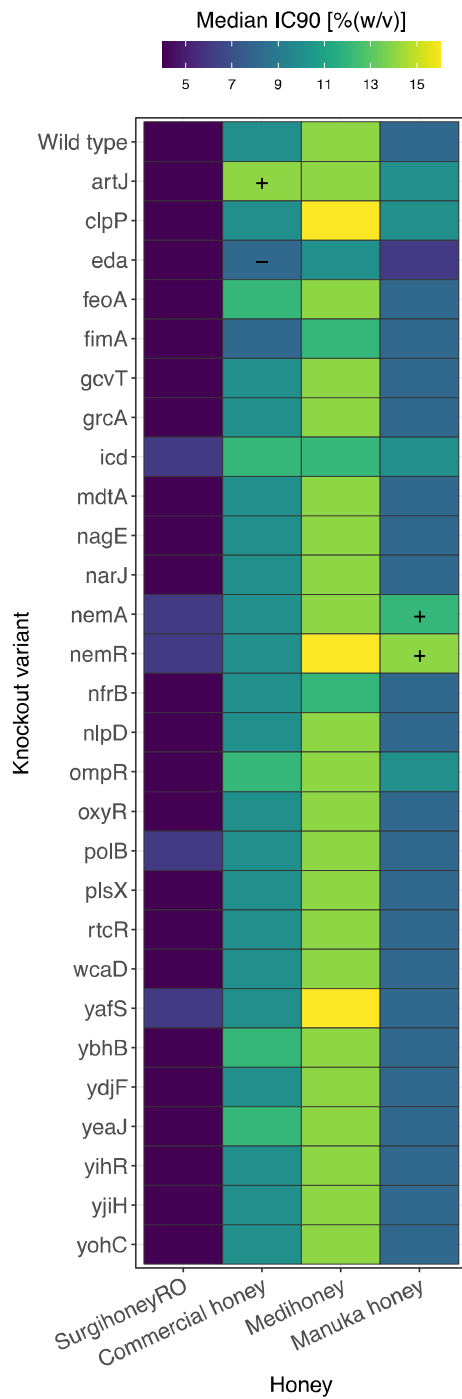

583 **Figure 3.**

584 **Figure 3. Honey susceptibility of single-gene deletion variants.** Each cell shows the median IC<sub>90</sub>  
585 towards four different honeys (columns) for the ancestral strain *E. coli* K-12 BW25113 (top row) or  
586 one of 28 single-gene knockout variants (other rows). Each cell is the median value of three  
587 independent replicates; combinations where all replicates of a putative resistant mutant were  
588 higher/lower than all replicates of the ancestor in the same treatment are indicated with a “+”/“-”.  
589 Individual replicates for each strain are shown in Fig. S5.

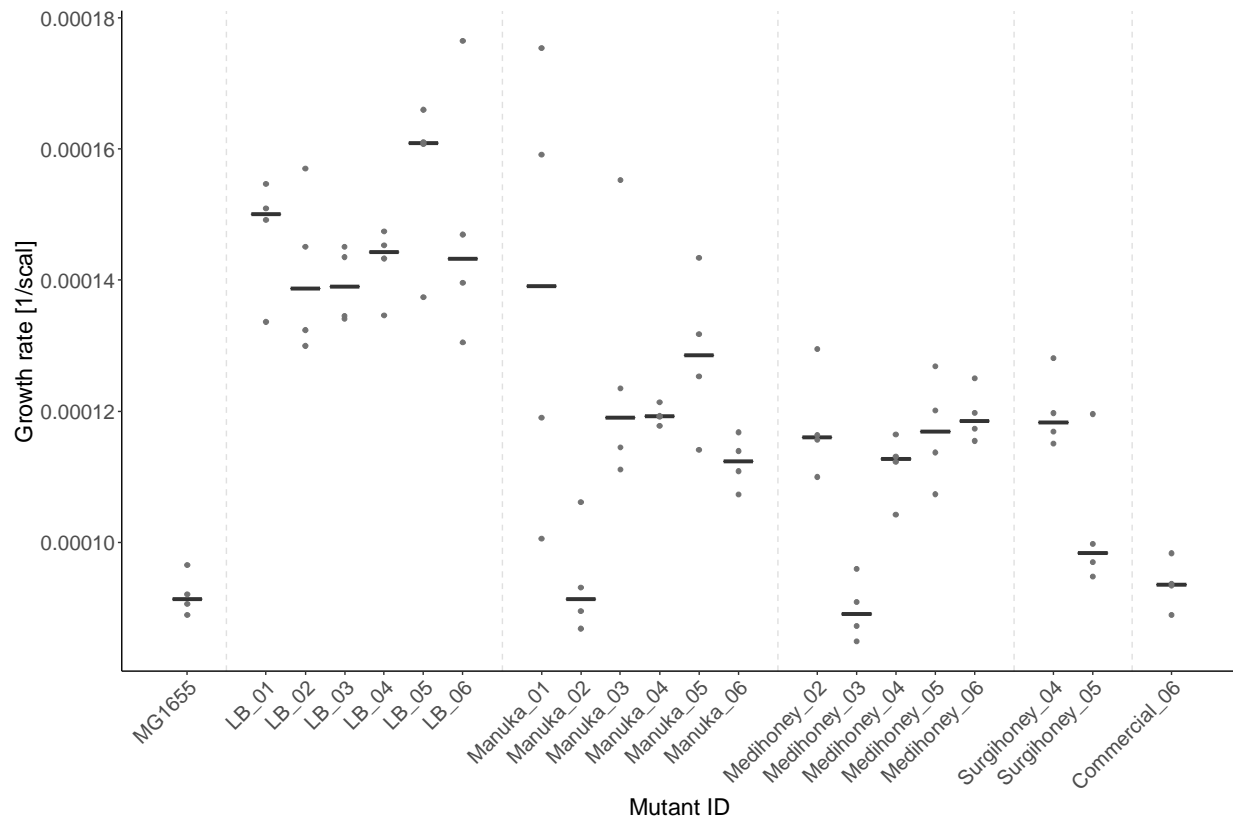

590

591 **Figure 4.**

592 **Figure 4. Growth rate of experimentally evolved isolates in the absence of honey.** Population  
593 growth rate (*y*-axis) is shown for the wild type (MG1655), six mutants serially passaged in honey-free  
594 LB (LB\_01-LB\_06), and 14 mutants serially passaged in different honeys (labelled according to  
595 honey and replicate; *x*-axis). Each black line gives the median of four replicates (replicates shown as  
596 dots).

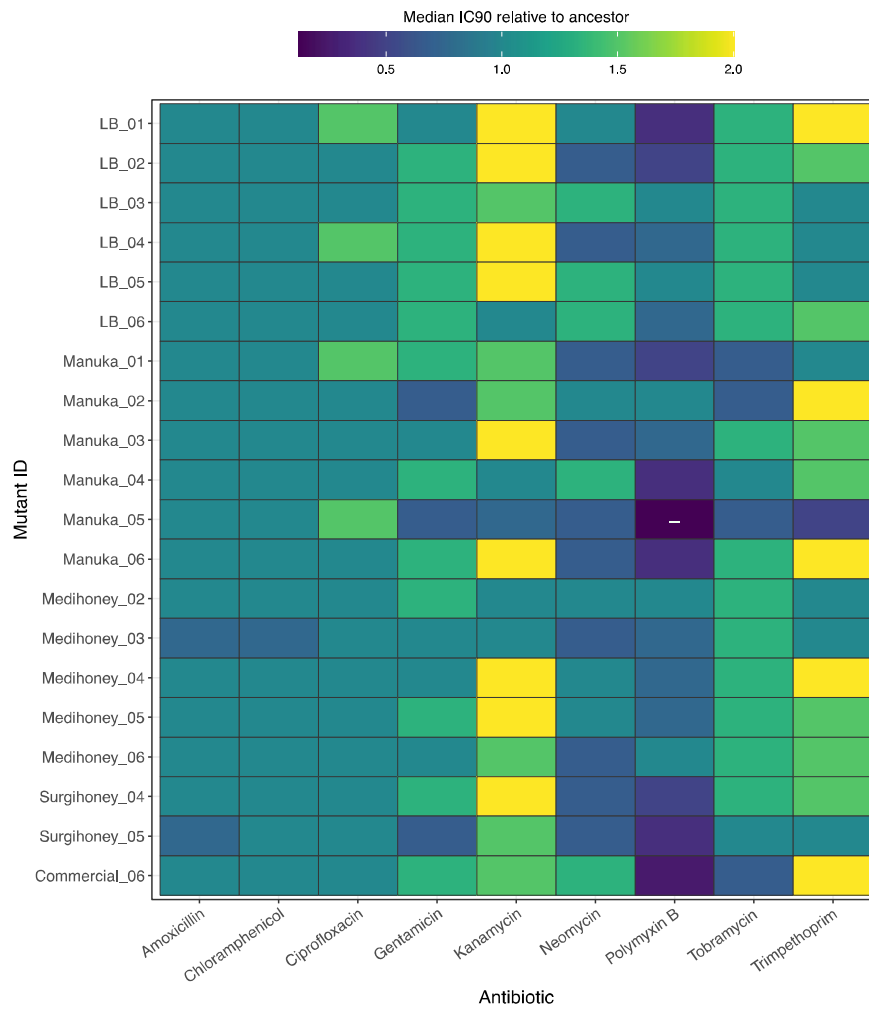

597 **Figure 5.**

598 **Figure 5. Resistance of serially-passaged, putative honey-resistant mutants against nine**  
599 **different antibiotics, relative to the wild type.** The matrix shows the median IC<sub>90</sub> towards nine  
600 antibiotics of 20 serially-passaged isolates relative to the median IC<sub>90</sub> of the parental strain, *E. coli* K-  
601 12 MG1655. Blue/dark seagreen signify susceptibility, yellow/light green resistance relative to the  
602 parental strain; combinations where all replicates of a given isolate were lower than all replicates of  
603 the ancestor in the same treatment are indicated with a “-”. Individual replicates for each strain are  
604 shown in Fig. S7.  
605



606 **Acknowledgements**

607 See title page.

608

609 **Data Archiving Statement**

610 The data that support the findings of this study will be made openly available at Dryad Digital

611 Repository: to be completed after manuscript is accepted for publication.

612 **References**

- 613 Abdel-Azim, S.G., Abdel-Azim, A.G., Piasecki, B.P., and Abdel-Azim, G.A. (2019) Characterization  
614 of the Gain and Loss of Resistance to Antibiotics versus Tolerance to Honey as an  
615 Antimutagenic and Antimicrobial Medium in Extended-Time Serial Transfer Experiments.  
616 *Pharmacognosy Res* **11**: 147–54.
- 617 Adams, C.J., Boulton, C.H., Deadman, B.J., Farr, J.M., Grainger, M.N.C., Manley-Harris, M., and  
618 Snow, M.J. (2008) Isolation by HPLC and characterisation of the bioactive fraction of New  
619 Zealand manuka (*Leptospermum scoparium*) honey. *Carbohydr Res* **343**: 651–659.
- 620 Allen, K.L., Molan, P.C., and Reid, G.M. (1991) A Survey of the Antibacterial Activity of Some New  
621 Zealand Honeys. *J Pharm Pharmacol* **43**: 817–822.
- 622 Allen, R.C., Pfrunder-Cardozo, K.R., Meinel, D., Egli, A., and Hall, A.R. (2017) Associations among  
623 antibiotic and phage resistance phenotypes in natural and clinical *Escherichia coli* isolates. *MBio*  
624 **8**: e01341-17.
- 625 Amores, G.R., De Las Heras, A., Sanches-Medeiros, A., Elfick, A., and Silva-Rocha, R. (2017)  
626 Systematic identification of novel regulatory interactions controlling biofilm formation in the  
627 bacterium *Escherichia coli*. *Sci Rep* **7**: 1–14.
- 628 Andersson, D.I. and Hughes, D. (2010) Antibiotic resistance and its cost: Is it possible to reverse  
629 resistance? *Nat Rev Microbiol* **8**: 260–271.
- 630 Ankley, L.M., Monteiro, M.P., Camp, K.M., O’Quinn, R., and Castillo, A.R. (2020) Manuka honey  
631 chelates iron and impacts iron regulation in key bacterial pathogens. *J Appl Microbiol* **128**:  
632 1015–1024.
- 633 Baba, T., Ara, T., Hasegawa, M., Takai, Y., Okumura, Y., Baba, M., et al. (2006) Construction of  
634 *Escherichia coli* K-12 in-frame, single-gene knockout mutants: The Keio collection. *Mol Syst*  
635 *Biol* **2**.
- 636 Badet, C. and Quero, F. (2011) The in vitro effect of manuka honeys on growth and adherence of oral  
637 bacteria. *Anaerobe* **17**: 19–22.
- 638 Baker-Austin, C., Wright, M.S., Stepanauskas, R., and McArthur, J. V. (2006) Co-selection of  
639 antibiotic and metal resistance. *Trends Microbiol* **14**: 176–182.
- 640 Basualdo, C., Sgroy, V., Finola, M.S., and Marioli, J.M. (2007) Comparison of the antibacterial  
641 activity of honey from different provenance against bacteria usually isolated from skin wounds.  
642 *Vet Microbiol* **124**: 375–381.
- 643 Baym, M., Stone, L.K., and Kishony, R. (2016) Multidrug evolutionary strategies to reverse antibiotic  
644 resistance. *Science (80- )* **351**.
- 645 Bischofberger, A.M., Baumgartner, M., Pfrunder-Cardozo, K.R., Allen, R.C., and Hall, A.R. (2020)  
646 Associations between sensitivity to antibiotics, disinfectants and heavy metals in natural, clinical  
647 and laboratory isolates of *Escherichia coli*. *Environ Microbiol* **00**: 1–16.
- 648 Bolger, A.M., Lohse, M., and Usadel, B. (2014) Trimmomatic: A flexible trimmer for Illumina  
649 sequence data. *Bioinformatics* **30**: 2114–2120.
- 650 Braoudaki, M. and Hilton, A.C. (2004) Low level of cross-resistance between triclosan and antibiotics  
651 in *Escherichia coli* K-12 and *E. coli* O55 compared to *E. coli* O157. *FEMS Microbiol Lett* **235**:  
652 305–309.
- 653 Breasted, J.H. (1948) *The Edwin Smith Surgical Papyrus*, Breasted, J.H. (ed) Chicago: The University  
654 of Chicago Press.
- 655 Brudzynski, K. and Sjaarda, C. (2014) Antibacterial compounds of Canadian honeys target bacterial  
656 cell wall inducing phenotype changes, growth inhibition and cell lysis that resemble action of  $\beta$ -  
657 lactam antibiotics. *PLoS One* **9**: 106967.

- 658 Camplin, A.L. and Maddocks, S.E. (2014) Manuka honey treatment of biofilms of *Pseudomonas*  
659 *aeruginosa* results in the emergence of isolates with increased honey resistance. *Ann Clin*  
660 *Microbiol Antimicrob* **13**: 19.
- 661 Carnwath, R., Graham, E.M., Reynolds, K., and Pollock, P.J. (2014) The antimicrobial activity of  
662 honey against common equine wound bacterial isolates. *Vet J* **199**: 110–114.
- 663 Carter, D.A., Blair, S.E., Cokcetin, N.N., Bouzo, D., Brooks, P., Schothauer, R., and Harry, E.J.  
664 (2016) Therapeutic manuka honey: No longer so alternative. *Front Microbiol* **7**: 1–11.
- 665 Chittezhham Thomas, V., Kinkead, L.C., Janssen, A., Schaeffer, C.R., Woods, K.M., Lindgren, J.K., et  
666 al. (2013) A dysfunctional tricarboxylic acid cycle enhances fitness of *Staphylococcus*  
667 *epidermidis* during  $\beta$ -lactam stress. *MBio* **4**: e00437-13.
- 668 Clugston, S.L., Barnard, J.F.J., Kinach, R., Miedema, D., Ruman, R., Daub, E., and Honek, J.F.  
669 (1998) Overproduction and characterization of a dimeric non-zinc glyoxalase I from *Escherichia*  
670 *coli*: Evidence for optimal activation by nickel ions. *Biochemistry* **37**: 8754–8763.
- 671 Cooke, J., Dryden, M., Patton, T., Brennan, J., and Barrett, J. (2015) The antimicrobial activity of  
672 prototype modified honeys that generate reactive oxygen species (ROS) hydrogen peroxide.  
673 *BMC Res Notes* **8**: 20.
- 674 Cooper, R.A., Jenkins, L., Henriques, A.F.M., Duggan, R.S., and Burton, N.F. (2010) Absence of  
675 bacterial resistance to medical-grade manuka honey. *Eur J Clin Microbiol Infect Dis* **29**: 1237–  
676 1241.
- 677 Costerton, J.W., Lewandowski, Z., Caldwell, D.E., Korber, D.R., and Lappin-Scott, H.M. (1995)  
678 Microbial biofilms. *Annu Rev Microbiol* **49**: 711–45.
- 679 Deatherage, D.E. and Barrick, J.E. (2014) Identification of mutations in laboratory-evolved microbes  
680 from next-generation sequencing data using breseq. *Methods Mol Biol* **1151**: 165–188.
- 681 Descottes, B. (2009) Cicatrisation par le miel, l'expérience de 25 années. *Phytotherapie* **7**: 112–116.
- 682 Dowd, S.E., Sun, Y., Secor, P.R., Rhoads, D.D., Wolcott, B.M., James, G.A., and Wolcott, R.D.  
683 (2008) Survey of bacterial diversity in chronic wounds using Pyrosequencing, DGGE, and full  
684 ribosome shotgun sequencing. *BMC Microbiol* **8**: 43.
- 685 Dunford, C.E. and Hanano, R. (2004) Acceptability to patients of a honey dressing for non-healing  
686 venous leg ulcers. *J Wound Care* **13**: 193–197.
- 687 Gutmann, L., Williamson, R., Moreau, N., Kitzis, M.D., Collatz, E., Acar, J.F., and Goldstein, F.W.  
688 (1985) Cross-resistance to nalidixic acid, trimethoprim, and chloramphenicol associated with  
689 alterations in outer membrane proteins of *klebsiella*, *enterobacter*, and *serratia*. *J Infect Dis* **151**:  
690 501–507.
- 691 Haffejee, I.E. and Moosa, A. (1985) Honey in the treatment of infantile gastroenteritis. *Br Med J (Clin*  
692 *Res Ed)* **290**: 1866.
- 693 Halstead, F.D., Webber, M.A., Rauf, M., Burt, R., Dryden, M., and Oppenheim, B.A. (2016) In vitro  
694 activity of an engineered honey, medical-grade honeys, and antimicrobial wound dressings  
695 against biofilm-producing clinical bacterial isolates. *J Wound Care* **25**: 93–102.
- 696 Henriques, A.F., Jenkins, R.E., Burton, N.F., and Cooper, R.A. (2011) The effect of manuka honey on  
697 the structure of *Pseudomonas aeruginosa*. *Eur J Clin Microbiol Infect Dis* **30**: 167–171.
- 698 Hillitt, K.L., Jenkins, R.E., Spiller, O.B., and Beeton, M.L. (2017) Antimicrobial activity of Manuka  
699 honey against antibiotic-resistant strains of the cell wall-free bacteria *Ureaplasma parvum* and  
700 *Ureaplasma urealyticum*. *Lett Appl Microbiol* **64**: 198–202.
- 701 Iino, T., Komeda, Y., Kutsukake, K., Macnab, R.M., Matsumura, P., Parkinson, J.S., et al. (1988)  
702 New unified nomenclature for the flagellar genes of *Escherichia coli* and *Salmonella*  
703 *typhimurium*. *Microbiol Rev* **52**: 533–535.

- 704 Irish, J., Blair, S., and Carter, D.A. (2011) The antibacterial activity of honey derived from Australian  
705 flora. *PLoS One* **6**: e18229.
- 706 Jenkins, R., Burton, N., and Cooper, R. (2014) Proteomic and genomic analysis of methicillin-  
707 resistant staphylococcus aureus (MRSA) exposed to manuka honey in vitro demonstrated down-  
708 regulation of virulence markers. *J Antimicrob Chemother* **69**: 603–615.
- 709 Klemm, P. (1986) Two regulatory fim genes, fimB and fimE, control the phase variation of type 1  
710 fimbriae in Escherichia coli. *EMBO J* **5**: 1389–1393.
- 711 Knipping, S., Grünewald, B., and Hirt, R. (2012) Erste Erfahrungen mit medizinischem Honig in der  
712 Wundbehandlung im Kopf-Hals-Bereich. *HNO* **60**: 830–836.
- 713 Knöppel, A., Knopp, M., Albrecht, L.M., Lundin, E., Lustig, U., Näsvall, J., and Andersson, D.I.  
714 (2018) Genetic adaptation to growth under laboratory conditions in Escherichia coli and  
715 Salmonella enterica. *Front Microbiol* **9**: 1–16.
- 716 Knottenbelt, D.C. (2014) Honey in wound management: Myth, mystery, magic or marvel? *Vet J* **199**:  
717 5–6.
- 718 Kronka, J.M., Cooper, R.A., and Maddocks, S.E. (2013) Manuka honey inhibits siderophore  
719 production in Pseudomonas aeruginosa. *J Appl Microbiol* **115**: 86–90.
- 720 Kwakman, P.H.S., Van den Akker, J.P.C., Güçlü, A., Aslami, H., Binnekade, J.M., de Boer, L., et al.  
721 (2008) Medical Grade Honey Kills Antibiotic Resistant Bacteria In Vitro and Eradicates Skin  
722 Colonization. *Clin Infect Dis* **46**: 1677–1682.
- 723 Kwakman, P.H.S., te Velde, A.A., de Boer, L., Vandenbroucke-Grauls, C.M.J.E., and Zaat, S.A.J.  
724 (2011) Two major medicinal honeys have different mechanisms of bactericidal activity. *PLoS*  
725 *One* **6**: e17709.
- 726 Lee, J.H., Park, J.H., Kim, J.A., Neupane, G.P., Cho, M.H., Lee, C.S., and Lee, J. (2011) Low  
727 concentrations of honey reduce biofilm formation, quorum sensing, and virulence in Escherichia  
728 coli O157:H7. *Biofouling* **27**: 1095–1104.
- 729 Liu, X. and Matsumura, P. (1994) The FlhD/FlhC complex, a transcriptional activator of the  
730 Escherichia coli flagellar class II operons. *J Bacteriol* **176**: 7345–7351.
- 731 Loughlin, M.F., Jones, M. V., and Lambert, P.A. (2002) Pseudomonas aeruginosa cells adapted to  
732 benzalkonium chloride show resistance to other membrane-active agents but not to clinically  
733 relevant antibiotics. *J Antimicrob Chemother* **49**: 631–639.
- 734 Lu, J., Carter, D.A., Turnbull, L., Rosendale, D., Hedderley, D., Stephens, J., et al. (2013) The Effect  
735 of New Zealand Kanuka, Manuka and Clover Honeys on Bacterial Growth Dynamics and  
736 Cellular Morphology Varies According to the Species. *PLoS One* **8**: 55898.
- 737 Lu, J., Cokcetin, N.N., Burke, C.M., Turnbull, L., Liu, M., Carter, D.A., et al. (2019) Honey can  
738 inhibit and eliminate biofilms produced by Pseudomonas aeruginosa. *Sci Rep* **9**: 1–13.
- 739 MacLean, M.J., Ness, L.S., Ferguson, G.P., and Booth, I.R. (1998) The role of glyoxalase I in the  
740 detoxification of methylglyoxal and in the activation of the KefB K<sup>+</sup> efflux system in  
741 Escherichia coli. *Mol Microbiol* **27**: 563–571.
- 742 Maddocks, S.E. and Jenkins, R.E. (2013) Honey: A sweet solution to the growing problem of  
743 antimicrobial resistance? *Future Microbiol* **8**: 1419–1429.
- 744 Magnet, S. and Blanchard, J.S. (2005) Molecular insights into aminoglycoside action and resistance.  
745 *Chem Rev* **105**: 477–497.
- 746 Mannervik, B. (2008) Molecular enzymology of the glyoxalase system. *Drug Metabol Drug Interact*  
747 **23**: 13–27.
- 748 Mavric, E., Wittmann, S., Barth, G., and Henle, T. (2008) Identification and quantification of  
749 methylglyoxal as the dominant antibacterial constituent of Manuka (Leptospermum scoparium)

- 750 honeys from New Zealand. *Mol Nutr Food Res* **52**: 483–489.
- 751 Merckoll, P., Jonassen, T.Ø., Vad, M.E., Jeansson, S.L., and Melby, K.K. (2009) Bacteria, biofilm  
752 and honey: A study of the effects of honey on “planktonic” and biofilm-embedded chronic  
753 wound bacteria. *Scand J Infect Dis* **41**: 341–347.
- 754 Molan, P.C. (1992) THE ANTIBACTERIAL ACTIVITY OF HONEY. 1. The nature of the  
755 antibacterial activity. *Bee World* **73**: 5–28.
- 756 Molan, P.C. (1999) Why honey is effective as a medicine. I. Its use in modern medicine. *Bee World*  
757 **80**: 80–92.
- 758 Molan, P.C. and Betts, J.A. (2004) Clinical usage of honey as a wound dressing: an update. *J Wound*  
759 *Care* **13**: 353–356.
- 760 Niba, E.T.E., Naka, Y., Nagase, M., Mori, H., and Kitakawa, M. (2007) A genome-wide approach to  
761 identify the genes involved in biofilm formation in *E. coli*. *DNA Res* **14**: 237–246.
- 762 Nolan, V.C., Harrison, J., and Cox, J.A.G. (2019) Dissecting the antimicrobial composition of honey.  
763 *Antibiotics* **8**: 1–16.
- 764 O’Neill, J. (2014) Antimicrobial Resistance: Tackling a crisis for the health and wealth of nations The  
765 Review on Antimicrobial Resistance Chaired.
- 766 Oliveira, A., Ribeiro, H.G., Silva, A.C., Silva, M.D., Sousa, J.C., Rodrigues, C.F., et al. (2017)  
767 Synergistic antimicrobial interaction between honey and phage against *Escherichia coli* biofilms.  
768 *Front Microbiol* **8**: 2407.
- 769 Oliveira, A., Sousa, J.C., Silva, A.C., Melo, L.D.R., and Sillankorva, S. (2018) Chestnut Honey and  
770 Bacteriophage Application to Control *Pseudomonas aeruginosa* and *Escherichia coli* Biofilms:  
771 Evaluation in an ex vivo Wound Model. *Front Microbiol* **9**: 1725.
- 772 Ozyamak, E., De Almeida, C., De Moura, A.P.S., Miller, S., and Booth, I.R. (2013) Integrated stress  
773 response of *Escherichia coli* to methylglyoxal: Transcriptional readthrough from the *nemRA*  
774 operon enhances protection through increased expression of glyoxalase I. *Mol Microbiol* **88**:  
775 936–950.
- 776 Ozyamak, E., Black, S.S., Walker, C.A., MacLean, M.J., Bartlett, W., Miller, S., and Booth, I.R.  
777 (2010) The critical role of S-lactoylglutathione formation during methylglyoxal detoxification in  
778 *Escherichia coli*. *Mol Microbiol* **78**: 1577–1590.
- 779 Paulsen, I.T., Brown, M.H., and Skurray, R.A. (1996) Proton-dependent multidrug efflux systems.  
780 *Microbiol Rev* **60**: 575–608.
- 781 Philippon, A., Labia, R., and Jacoby, G. (1989) MINIREVIEW Extended-Spectrum beta-Lactamases.  
782 *Antimicrob Agents Chemother* **33**: 1131–1136.
- 783 Prigent-Combaret, C., Brombacher, E., Vidal, O., Ambert, A., Lejeune, P., Landini, P., and Dorel, C.  
784 (2001) Complex regulatory network controls initial adhesion and biofilm formation in  
785 *Escherichia coli* via regulation of the *csgD* gene. *J Bacteriol* **183**: 7213–7223.
- 786 Prüß, B.M. and Matsumura, P. (1996) A regulator of the flagellar regulon of *Escherichia coli*, *flhD*,  
787 also affects cell division. *J Bacteriol* **178**: 668–674.
- 788 Scanlan, P.D., Hall, A.R., Blackshields, G., Friman, V.P., Davis, M.R., Goldberg, J.B., and Buckling,  
789 A. (2015) Coevolution with bacteriophages drives genome-wide host evolution and constrains  
790 the acquisition of abiotic-beneficial mutations. *Mol Biol Evol* **32**: 1425–1435.
- 791 Shan, Y., Lazinski, D., Rowe, S., Camilli, A., and Lewis, K. (2015) Genetic Basis of Persister  
792 Tolerance to Aminoglycosides in *Escherichia coli*. *MBio* **6**: e00078-15.
- 793 Su, Y. bin, Peng, B., Li, H., Cheng, Z. xue, Zhang, T. tuo, Zhu, J. xin, et al. (2018) Pyruvate cycle  
794 increases aminoglycoside efficacy and provides respiratory energy in bacteria. *Proc Natl Acad*  
795 *Sci U S A* **115**: E1578–E1587.

- 796 Suojala, L., Kaartinen, L., and Pyörälä, S. (2013) Treatment for bovine Escherichia coli mastitis - an  
797 evidence-based approach. *J Vet Pharmacol Ther* **36**: 521–531.
- 798 Szybalski, W. and Bryson, V. (1952) Genetic studies on microbial cross resistance to toxic agents:  
799 Cross resistance of Escherichia coli to fifteen antibiotics. *J Bacteriol* **64**: 489–499.
- 800 Tadesse, D.A., Zhao, S., Tong, E., Ayers, S., Singh, A., Bartholomew, M.J., and McDermott, P.F.  
801 (2012) Antimicrobial drug resistance in Escherichia coli from humans and food animals, United  
802 States, 1950–2002. *Emerg Infect Dis* **18**: 741–749.
- 803 Töttemeyer, S., Booth, N.A., Nichols, W.W., Dunbar, B., and Booth, I.R. (1998) From famine to feast:  
804 The role of methylglyoxal production in Escherichia coli. *Mol Microbiol* **27**: 553–562.
- 805 Tramuta, C., Nebbia, P., Robino, P., Giusto, G., Gandini, M., Chiadò-Cutin, S., and Grego, E. (2017)  
806 Antibacterial activities of Manuka and Honeydew honey-based membranes against bacteria that  
807 cause wound infections in animals. *Schweiz Arch Tierheilkd* **159**: 117–121.
- 808 Truchado, P., López-Gálvez, F., Gil, M.I., Tomás-Barberán, F.A., and Allende, A. (2009) Quorum  
809 sensing inhibitory and antimicrobial activities of honeys and the relationship with individual  
810 phenolics. *Food Chem* **115**: 1337–1344.
- 811 Vandamme, L., Heyneman, A., Hoeksema, H., Verbelen, J., and Monstrey, S. (2013) Honey in  
812 modern wound care: A systematic review. *Burns* **39**: 1514–1525.
- 813 Wang, R., Starkey, M., Hazan, R., and Rahme, L.G. (2012) Honey’s ability to counter bacterial  
814 infections arises from both bactericidal compounds and QS inhibition. *Front Microbiol* **3**: 1–8.
- 815 Wasfi, R., Elkhatib, W.F., and Khairalla, A.S. (2016) Effects of selected egyptian honeys on the  
816 cellular ultrastructure and the gene expression profile of Escherichia coli. *PLoS One* **11**:  
817 e0150984.
- 818 Werner, A. and Laccourreya, O. (2011) Honey in otorhinolaryngology: When, why and how? *Eur*  
819 *Ann Otorhinolaryngol Head Neck Dis* **128**: 133–137.
- 820 White, J.W., Subers, M.H., and Schepartz, A.I. (1963) The identification of inhibine, the antibacterial  
821 factor in honey, as hydrogen peroxide and its origin in a honey glucose-oxidase system. *BBA -*  
822 *Biochim Biophys Acta* **73**: 57–70.
- 823 WHO (2018) Fact Sheet Antibacterial Resistance.
- 824 Willix, D.J., Molan, P.C., and Harfoot, C.G. (1992) A comparison of the sensitivity of  
825 wound-infecting species of bacteria to the antibacterial activity of manuka honey and other  
826 honey. *J Appl Bacteriol* **73**: 388–394.
- 827 Wu, Y. and Outten, F.W. (2009) IscR controls iron-dependent biofilm formation in Escherichia coli  
828 by regulating type I fimbria expression. *J Bacteriol* **191**: 1248–1257.
- 829 Yabes, J.M., White, B.K., Murray, C.K., Sanchez, C.J., Mende, K., Beckius, M.L., et al. (2017) In  
830 Vitro activity of Manuka Honey and polyhexamethylene biguanide on filamentous fungi and  
831 toxicity to human cell lines. *Med Mycol* **55**: 334–343.
- 832 Zhou, S., Zhuang, Y., Zhu, X., Yao, F., Li, Haiyan, Li, Huifang, et al. (2019) YhjX regulates the  
833 growth of Escherichia coli in the presence of a subinhibitory concentration of gentamicin and  
834 mediates the adaptive resistance to gentamicin. *Front Microbiol* **10**: 1–10.
- 835
